# Supplementary material for: The availability, prices and affordability of essential medicines in Malawi: A cross-sectional study
Source: PubMed Central journal article supplement (PMC6372227; doi:10.1371/journal.pone.0212125), 2019-02-12
Supplement: pone.0212125.s001.pdf [file pone.0212125.s001.pdf]

**S1 Table. List of Tracer Medicines for Measuring Stockout by Ministry of Health Malawi.**

| <b>Name of medicine</b>                                                        | <b>Whether included in this study or not</b> | <b>Reasons for exclusion</b>                                |
|--------------------------------------------------------------------------------|----------------------------------------------|-------------------------------------------------------------|
| Lumefantrine/Artemether 20/120 mg - 6x1                                        | Not selected                                 | Provided through donation                                   |
| Lumefantrine/Artemether 20/120 mg - 6x4                                        | Not selected                                 | Provided through donation                                   |
| Malaria Rapid Diagnostic Test Kits                                             | Not selected                                 | Laboratory or surgical items and not the focus of the study |
| Artesunate Injection 60mg                                                      | Not selected                                 | Provided through donation                                   |
| Magnesium sulphate 50%, 2ml ampoule                                            | Selected                                     |                                                             |
| Male Condoms                                                                   | Not selected                                 | Provided through donation                                   |
| Medroxyprogesterone acetate inj, 150mg/ml (DEPOPROVERA)                        | Not selected                                 | Provided through donation                                   |
| Oxytocin 10 IU/ml, 1ml                                                         | Selected                                     |                                                             |
| Amoxicillin 125mg/5ml suspension                                               | Selected                                     |                                                             |
| Oral rehydration salt, sachet (WHO formula) for 1L solution                    | Not selected                                 |                                                             |
| Tetracycline eye ointment 1%, 3.5g/5gm                                         | Selected                                     |                                                             |
| Gentamicin 40mg/ml, 2ml                                                        | Selected                                     |                                                             |
| Benzylpenicillin 3g (5MU), PFR                                                 | Selected                                     |                                                             |
| Determine HIV Test Kits                                                        | Not selected                                 | Provided through donation                                   |
| Tenofovir (TDF) + Lamivudine (3TC) + Efavirenz (EFV), 300+300+600mg, 30's (5A) | Not selected                                 | Provided through donation                                   |
| RH 150/75                                                                      | Not selected                                 | Provided through donation                                   |
| RH 60/60                                                                       | Not selected                                 | Provided through donation                                   |
| Streptomycin 1g                                                                | Not selected                                 | Provided through donation                                   |
| Cotrimoxazole 480mg                                                            | Selected                                     |                                                             |
| Dextrose (glucose) 5%, 500ml                                                   | Not selected                                 |                                                             |
| Diazepam 5mg/ml, 2ml                                                           | Selected                                     |                                                             |
| Glove disposable powdered latex large, 100 pieces                              | Not selected                                 | Laboratory or surgical items and not the focus of the study |
| Glove disposable powdered latex medium, 100 pieces                             | Not selected                                 | Laboratory or surgical items and not the focus of the study |
| Glove surgeon's size 7½ sterile, pair                                          | Not selected                                 | Laboratory or surgical items and not the focus of the study |
| Metronidazole 200mg                                                            | Selected                                     |                                                             |
| Sodium Chloride injectable 0.9% 500ml                                          | Selected                                     |                                                             |
| Syringe, autodestruct, 2ml, disposable, hypoluer with 23g needle               | Not selected                                 | Laboratory or surgical items and not the focus of the study |
| Syringe, autodestruct, 5ml, disposable, hypoluer with 21g needle               | Not selected                                 | Laboratory or surgical items and not the focus of the study |
| Amoxicillin 250mg                                                              | Selected                                     |                                                             |
