# Supplementary material for: The availability, prices and affordability of essential medicines in Malawi: A cross-sectional study
Source: PubMed Central journal article supplement (PMC6372227; doi:10.1371/journal.pone.0212125), 2019-02-12
Supplement: pone.0212125.s003.pdf [file pone.0212125.s003.pdf]

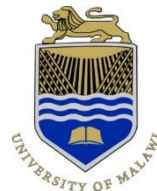

College of Medicine-Pharmacy Department

A SURVEY ON AVAILABILITY AND AFFORDABILITY OF ESSENTIAL MEDICINES IN SOUTH AND CENTRAL REGIONS OF MALAWI

Principal Investigator: Felix Khuluza

Co-Investigator: Christine Haefele-Abah

## Medicine Price Data Collection Form

**Use a separate form for each medicine outlet**

COMREC #: P.03/17/2131  
PMPB#: PMPB/PFK/7

Date : \_\_\_\_\_ Survey area number : \_\_\_\_\_

Name of town/village/district : \_\_\_\_\_

Name of medicine outlet (optional): \_\_\_\_\_

Medicine outlet unique survey ID (mandatory): \_\_\_\_\_

Distance in km from nearest town (population >50 000): \_\_\_\_\_

Type of medicine outlet :

Public sector facility (specify level of care below):

Primary care facility

Secondary care facility

Tertiary care facility

Private sector medicine outlet

Other sector medicine outlet (please specify): \_\_\_\_\_

Type of price :

- Procurement price       Price the patient pays

Type of data:

- Sample outlet     back-up outlet     validation visit

Name of manager of the medicine outlet (Optional-seek consent first):

Name of person(s) who provided information on medicine prices and availability (if different from manager):

Name of data collectors :

### Verification

To be completed by the area supervisor at the end of the day, once data have been verified. Signed: \_\_\_\_\_ Date: \_\_\_\_\_

### Medicine Price Data Collection Form

Lowest priced generic equivalent product: determined at facility

| A                                   | B                      | C                        | D            | E                | F                     | G               | H                   | I                             | J        |
|-------------------------------------|------------------------|--------------------------|--------------|------------------|-----------------------|-----------------|---------------------|-------------------------------|----------|
| Generic name, dosage form, strength | Medicine Type          | Brand or product name(s) | Manufacturer | Available yes/no | Pack size recommended | Pack size found | Price of pack found | Unit price (4 decimal places) | Comments |
| Acyclovir 400 mg cap/tab            | Highest priced generic |                          |              |                  | 100                   |                 |                     | per cap/tab                   |          |
|                                     | Most sold generic      |                          |              |                  | 100                   |                 |                     | per cap/tab                   |          |
|                                     | Lowest-priced generic  |                          |              |                  | 100                   |                 |                     | per cap/tab                   |          |
| Acyclovir cream 5% 10G              | Highest priced generic |                          |              |                  | 10 G                  |                 |                     | per gram                      |          |
|                                     | Most sold generic      |                          |              |                  | 10 G                  |                 |                     | per gram                      |          |
|                                     | Lowest-priced generic  |                          |              |                  | 10 G                  |                 |                     | per gram                      |          |
| Albendazole Susp. 10% 20ML          | Highest priced generic |                          |              |                  | 20                    |                 |                     | per millilitre.               |          |
|                                     | Most sold generic      |                          |              |                  | 20                    |                 |                     | per millilitre                |          |
|                                     | Lowest-priced generic  |                          |              |                  | 20                    |                 |                     | per millilitre.               |          |

|                                     |                        |  |  |  |        |  |  |                |  |
|-------------------------------------|------------------------|--|--|--|--------|--|--|----------------|--|
| Amitriptyline 25 mg cap/tab         | Highest priced generic |  |  |  | 100    |  |  | per cap/tab    |  |
|                                     | Most sold generic      |  |  |  | 100    |  |  | per cap/tab    |  |
|                                     | Lowest-priced generic  |  |  |  | 100    |  |  | per cap/tab    |  |
| Amoxicillin 250 mg cap/tab          | Highest priced generic |  |  |  | 1000   |  |  | per cap/tab    |  |
|                                     | Most sold generic      |  |  |  | 1000   |  |  | per cap/tab    |  |
|                                     | Lowest-priced generic  |  |  |  | 1000   |  |  | per cap/tab    |  |
| Amoxicillin 25 mg/ ml Susp.         | Highest priced generic |  |  |  | 100 ML |  |  | per millilitre |  |
|                                     | Most sold generic      |  |  |  | 100 ML |  |  | per millilitre |  |
|                                     | Lowest-priced generic  |  |  |  | 100 ML |  |  | per millilitre |  |
| Benzypenicillin 5 MU/ Vial Inj.     | Highest priced generic |  |  |  | 1      |  |  | per vial.      |  |
|                                     | Most sold generic      |  |  |  | 1      |  |  | per vial       |  |
|                                     | Lowest-priced generic  |  |  |  | 1      |  |  | per vial       |  |
| Bisoprolol 5 mg cap/tab             | Highest priced generic |  |  |  | 60     |  |  | per cap/tab    |  |
|                                     | Most sold generic      |  |  |  | 60     |  |  | per cap/tab    |  |
|                                     | Lowest-priced generic  |  |  |  | 60     |  |  | per cap/tab    |  |
| Captopril 25 mg cap/tab             | Highest priced generic |  |  |  | 100    |  |  | per cap/tab    |  |
|                                     | Most sold generic      |  |  |  | 100    |  |  | per cap/tab    |  |
|                                     | Lowest-priced generic  |  |  |  | 100    |  |  | per cap/tab    |  |
| Carbamazepine 200 mg cap/tab        | Highest priced generic |  |  |  | 100    |  |  | per cap/tab    |  |
|                                     | Most sold generic      |  |  |  | 100    |  |  | per cap/tab    |  |
|                                     | Lowest-priced generic  |  |  |  | 100    |  |  | per cap/tab    |  |
| Ceftriaxone injection 1 g/vial vial | Highest priced generic |  |  |  | 1      |  |  | per vial       |  |
|                                     | Most sold generic      |  |  |  | 1      |  |  | per vial       |  |

|                                                 |                        |  |  |  |      |  |  |                |  |
|-------------------------------------------------|------------------------|--|--|--|------|--|--|----------------|--|
|                                                 | Lowest-priced generic  |  |  |  | 1    |  |  | per vial       |  |
| Cimetidine 400 mg cap/tab                       | Highest priced generic |  |  |  | 100  |  |  | per cap/tab    |  |
|                                                 | Most sold generic      |  |  |  | 100  |  |  | per cap/tab    |  |
|                                                 | Lowest-priced generic  |  |  |  | 100  |  |  | per cap/tab    |  |
| Ciprofloxacin 500 mg cap/tab                    | Highest priced generic |  |  |  | 100  |  |  | per cap/tab    |  |
|                                                 | Most sold generic      |  |  |  | 100  |  |  | per cap/tab    |  |
|                                                 | Lowest-priced generic  |  |  |  | 100  |  |  | per cap/tab    |  |
| Cotrimoxazole 80 + 400 mg cap/tab               | Highest priced generic |  |  |  | 1000 |  |  | per cap/tab    |  |
|                                                 | Most sold generic      |  |  |  | 1000 |  |  | per cap/tab    |  |
|                                                 | Lowest-priced generic  |  |  |  | 1000 |  |  | per cap/tab    |  |
| Co-trimoxazole suspension 8+40 mg/ml millilitre | Highest priced generic |  |  |  | 100  |  |  | per millilitre |  |
|                                                 | Most sold generic      |  |  |  | 100  |  |  | per millilitre |  |
|                                                 | Lowest-priced generic  |  |  |  | 100  |  |  | per millilitre |  |
| Diazepam 5 mg cap/tab                           | Highest priced generic |  |  |  | 100  |  |  | per cap/tab    |  |
|                                                 | Most sold generic      |  |  |  | 100  |  |  | per cap/tab    |  |
|                                                 | Lowest-priced generic  |  |  |  | 100  |  |  | per cap/tab    |  |
| Diazepam 5 mg/ ml Inj., 2 ml                    | Highest priced generic |  |  |  | 2    |  |  | per millilitre |  |
|                                                 | Most sold generic      |  |  |  | 2    |  |  | per millilitre |  |
|                                                 | Lowest-priced generic  |  |  |  | 2    |  |  | per millilitre |  |
| Diclofenac 50 mg cap/tab                        | Highest priced generic |  |  |  | 100  |  |  | per cap/tab    |  |
|                                                 | Most sold generic      |  |  |  | 100  |  |  | per cap/tab    |  |
|                                                 | Lowest-priced generic  |  |  |  | 100  |  |  | per cap/tab    |  |
| Ergometrine Maleate 200 mg/ ml Inj., 1 ml       | Highest priced generic |  |  |  | 1    |  |  | per millilitre |  |

|                                   |                        |  |  |  |      |  |  |                |  |
|-----------------------------------|------------------------|--|--|--|------|--|--|----------------|--|
|                                   | Most sold generic      |  |  |  | 1    |  |  | per millilitre |  |
|                                   | Lowest-priced generic  |  |  |  | 1    |  |  | per millilitre |  |
| Erythromycin 250 mg cap/tab       | Highest priced generic |  |  |  | 1000 |  |  | per cap/tab    |  |
|                                   | Most sold generic      |  |  |  | 1000 |  |  | per cap/tab    |  |
|                                   | Lowest-priced generic  |  |  |  | 1000 |  |  | per cap/tab    |  |
| Ethosuximide 250 mg cap/tab       | Highest priced generic |  |  |  | 100  |  |  | per cap/tab    |  |
|                                   | Most sold generic      |  |  |  | 100  |  |  | per cap/tab    |  |
|                                   | Lowest-priced generic  |  |  |  | 100  |  |  | per cap/tab    |  |
| Fluconazole 200 mg cap/tab        | Highest priced generic |  |  |  | 100  |  |  | per cap/tab    |  |
|                                   | Most sold generic      |  |  |  | 100  |  |  | per cap/tab    |  |
|                                   | Lowest-priced generic  |  |  |  | 100  |  |  | per cap/tab    |  |
| Gentamicin 40 mg/ ml Inj., 2 ml   | Highest priced generic |  |  |  | 2    |  |  | per millilitre |  |
|                                   | Most sold generic      |  |  |  | 2    |  |  | per millilitre |  |
|                                   | Lowest-priced generic  |  |  |  | 2    |  |  | per millilitre |  |
| Griseofulvin 125 mg cap/tab       | Highest priced generic |  |  |  | 100  |  |  | per cap/tab    |  |
|                                   | Most sold generic      |  |  |  | 100  |  |  | per cap/tab    |  |
|                                   | Lowest-priced generic  |  |  |  | 100  |  |  | per cap/tab    |  |
| Hydrochlorothiazide 25 mg cap/tab | Highest priced generic |  |  |  | 1000 |  |  | per cap/tab    |  |
|                                   | Most sold generic      |  |  |  | 1000 |  |  | per cap/tab    |  |
|                                   | Lowest-priced generic  |  |  |  | 1000 |  |  | per cap/tab    |  |
| Ibuprofen 200 mg cap/tab          | Highest priced generic |  |  |  | 1000 |  |  | per cap/tab    |  |
|                                   | Most sold generic      |  |  |  | 1000 |  |  | per cap/tab    |  |
|                                   | Lowest-priced generic  |  |  |  | 1000 |  |  | per cap/tab    |  |

|                                                   |                        |  |  |  |      |  |  |                |  |
|---------------------------------------------------|------------------------|--|--|--|------|--|--|----------------|--|
| Insulin soluble 100 IU/<br>ml Inj., 10 ml Vial    | Highest priced generic |  |  |  | 10   |  |  | per millilitre |  |
|                                                   | Most sold generic      |  |  |  | 10   |  |  | per millilitre |  |
|                                                   | Lowest-priced generic  |  |  |  | 10   |  |  | per millilitre |  |
| Insulin Zink Susp. 100<br>IU/ ml Inj., 10 ml Vial | Highest priced generic |  |  |  | 10   |  |  | per millilitre |  |
|                                                   | Most sold generic      |  |  |  | 10   |  |  | per millilitre |  |
|                                                   | Lowest-priced generic  |  |  |  | 10   |  |  | per millilitre |  |
| Magnesium sulphate<br>50 % , 2 ml                 | Highest priced generic |  |  |  | 2    |  |  | per millilitre |  |
|                                                   | Most sold generic      |  |  |  | 2    |  |  | per millilitre |  |
|                                                   | Lowest-priced generic  |  |  |  | 2    |  |  | per millilitre |  |
| Mebendazole 500 mg<br>cap/tab                     | Highest priced generic |  |  |  | 100  |  |  | per cap/tab    |  |
|                                                   | Most sold generic      |  |  |  | 100  |  |  | per cap/tab    |  |
|                                                   | Lowest-priced generic  |  |  |  | 100  |  |  | per cap/tab    |  |
| Metformin 500 mg<br>cap/tab                       | Highest priced generic |  |  |  | 90   |  |  | per cap/tab    |  |
|                                                   | Most sold generic      |  |  |  | 90   |  |  | per cap/tab    |  |
|                                                   | Lowest-priced generic  |  |  |  | 90   |  |  | per cap/tab    |  |
| Methyldopa 250 mg<br>cap/tab                      | Highest priced generic |  |  |  | 100  |  |  | per cap/tab    |  |
|                                                   | Most sold generic      |  |  |  | 100  |  |  | per cap/tab    |  |
|                                                   | Lowest-priced generic  |  |  |  | 100  |  |  | per cap/tab    |  |
| Metronidazole 200/<br>250 mg cap/tab              | Highest priced generic |  |  |  | 1000 |  |  | per cap/tab    |  |
|                                                   | Most sold generic      |  |  |  | 1000 |  |  | per cap/tab    |  |
|                                                   | Lowest-priced generic  |  |  |  | 1000 |  |  | per cap/tab    |  |
| Misoprostol 200 mg<br>cap/tab                     | Highest priced generic |  |  |  | 100  |  |  | per cap/tab    |  |
|                                                   | Most sold generic      |  |  |  | 100  |  |  | per cap/tab    |  |

|                                            |                        |  |  |  |      |  |  |                |  |
|--------------------------------------------|------------------------|--|--|--|------|--|--|----------------|--|
|                                            | Lowest-priced generic  |  |  |  | 100  |  |  | per cap/tab    |  |
| Omeprazole 20 mg cap/tab                   | Highest priced generic |  |  |  | 30   |  |  | per cap/tab    |  |
|                                            | Most sold generic      |  |  |  | 30   |  |  | per cap/tab    |  |
|                                            | Lowest-priced generic  |  |  |  | 30   |  |  | per cap/tab    |  |
|                                            |                        |  |  |  |      |  |  |                |  |
| Oxytocin 10 IU/ ml Inj., 1 ml              | Highest priced generic |  |  |  | 1    |  |  | per millilitre |  |
|                                            | Most sold generic      |  |  |  | 1    |  |  | per millilitre |  |
|                                            | Lowest-priced generic  |  |  |  | 1    |  |  | per millilitre |  |
|                                            |                        |  |  |  |      |  |  |                |  |
| Paracetamol 500 mg cap/tab                 | Highest priced generic |  |  |  | 1000 |  |  | per cap/tab    |  |
|                                            | Most sold generic      |  |  |  | 1000 |  |  | per cap/tab    |  |
|                                            | Lowest-priced generic  |  |  |  | 1000 |  |  | per cap/tab    |  |
| Paracetamol suspension 24 mg/ml millilitre | Highest priced generic |  |  |  | 100  |  |  | per millilitre |  |
|                                            | Most sold generic      |  |  |  | 100  |  |  | per millilitre |  |
|                                            | Lowest-priced generic  |  |  |  | 100  |  |  | per millilitre |  |
| Paraldehyd 10 ml/ vial Inj                 | Highest priced generic |  |  |  | 10   |  |  | per millilitre |  |
|                                            | Most sold generic      |  |  |  | 10   |  |  | per millilitre |  |
|                                            | Lowest-priced generic  |  |  |  | 10   |  |  | per millilitre |  |
| Phenobarbital 200 mg/ ml Inj., 1 ml        | Highest priced generic |  |  |  | 1    |  |  | per millilitre |  |
|                                            | Most sold generic      |  |  |  | 1    |  |  | per millilitre |  |
|                                            | Lowest-priced generic  |  |  |  | 1    |  |  | per millilitre |  |
| Phenobarbital tab 30 mg cap/tab            | Highest priced generic |  |  |  | 1000 |  |  | per cap/tab    |  |
|                                            | Most sold generic      |  |  |  | 1000 |  |  | per cap/tab    |  |
|                                            | Lowest-priced generic  |  |  |  | 1000 |  |  | per cap/tab    |  |
| Phenytoin Na 50 mg/ ml Inj.                | Highest priced generic |  |  |  | 1    |  |  | per millilitre |  |
|                                            |                        |  |  |  |      |  |  |                |  |

|                                     |                        |  |  |  |      |  |  |                  |  |
|-------------------------------------|------------------------|--|--|--|------|--|--|------------------|--|
|                                     | Most sold generic      |  |  |  | 1    |  |  | per millilitre   |  |
|                                     | Lowest-priced generic  |  |  |  | 1    |  |  | per millilitre   |  |
| Phenytoin Na tab 100 mg cap/tab     | Highest priced generic |  |  |  | 100  |  |  | per cap/tab      |  |
|                                     | Most sold generic      |  |  |  | 100  |  |  | per cap/tab      |  |
|                                     | Lowest-priced generic  |  |  |  | 100  |  |  | per cap/tab      |  |
| Praziquantel 600 mg cap/tab         | Highest priced generic |  |  |  | 100  |  |  | per cap/tab      |  |
|                                     | Most sold generic      |  |  |  | 100  |  |  | per cap/tab      |  |
|                                     | Lowest-priced generic  |  |  |  | 100  |  |  | per cap/tab      |  |
| Salbutamol inhaler 100 mcg/dose     | Highest priced generic |  |  |  | 200  |  |  | per dose         |  |
|                                     | Most sold generic      |  |  |  | 200  |  |  | per dose         |  |
|                                     | Lowest-priced generic  |  |  |  | 200  |  |  | per dose         |  |
| Simvastatin 20mg cap/tab            | Highest priced generic |  |  |  | 30   |  |  | per cap/tab      |  |
|                                     | Most sold generic      |  |  |  | 30   |  |  | per cap/tab      |  |
|                                     | Lowest-priced generic  |  |  |  | 30   |  |  | per cap/tab      |  |
| Sodium Chloride 0,9 % Infusion, 1 l | Highest priced generic |  |  |  | 1000 |  |  | per millilitre   |  |
|                                     | Most sold generic      |  |  |  | 1000 |  |  | per millilitre   |  |
|                                     | Lowest-priced generic  |  |  |  | 1000 |  |  | per millilitre   |  |
| Sodium Valproate 200 mg cap/tab     | Highest priced generic |  |  |  | 100  |  |  | per cap/tab      |  |
|                                     | Most sold generic      |  |  |  | 100  |  |  | per cap/tab      |  |
|                                     | Lowest-priced generic  |  |  |  | 100  |  |  | per cap/tab      |  |
| Tetracycline 1 % m/m eye ointment   | Highest priced generic |  |  |  | 3.5  |  |  | per eye ointment |  |
|                                     | Most sold generic      |  |  |  | 3.5  |  |  | per eye ointment |  |
|                                     | Lowest-priced generic  |  |  |  | 3.5  |  |  | per eye ointment |  |



|                               |                        |  |  |  |     |  |  |             |  |
|-------------------------------|------------------------|--|--|--|-----|--|--|-------------|--|
| Zink sulfate 20 mg<br>cap/tab | Highest priced generic |  |  |  | 100 |  |  | per cap/tab |  |
|                               | Most sold generic      |  |  |  | 100 |  |  | per cap/tab |  |
|                               | Lowest-priced generic  |  |  |  | 100 |  |  | per cap/tab |  |

**Before leaving the facility :**

Data collectors should check that the data collection form is legible, accurate and complete before leaving the facility and returning completed forms to the area supervisor. They should report any problems as soon as possible. They should also check to see whether at least half of the survey medicines were available, to determine whether a visit to a back-up facility is required.
