# Supplementary material for: The availability, prices and affordability of essential medicines in Malawi: A cross-sectional study
Source: PubMed Central journal article supplement (PMC6372227; doi:10.1371/journal.pone.0212125), 2019-02-12
Supplement: pone.0212125.s004.pdf [file pone.0212125.s004.pdf]

**S4 Table. Calculation of medicine treatment costs and affordability.**

| Medicine name        | Strength   | Course of treatment | Number of units per treatment | Retail pharmacies        |                                       |                                    | CHAM facilities          |                                       |                                    | Private clinics          |                                       |                                    |
|----------------------|------------|---------------------|-------------------------------|--------------------------|---------------------------------------|------------------------------------|--------------------------|---------------------------------------|------------------------------------|--------------------------|---------------------------------------|------------------------------------|
|                      |            |                     |                               | Median price in US Cents | Price per course of treatment in US\$ | Number of days to afford treatment | Median price in US cents | Price per course of treatment in US\$ | Number of days to afford treatment | Median price in US cents | Price per course of treatment in US\$ | Number of days to afford treatment |
| Amitriptyline        | 25mg       | 3 tab/day, 30 days  | 90                            | 2.07                     | 1.86                                  | 1.40                               | 1.86                     | 1.67                                  | 1.26                               | 3.44                     | 3.10                                  | 2.34                               |
| Amoxicillin          | 250mg      | 6 cap/day, 7 days   | 42                            | 3.44                     | 1.45                                  | 1.09                               | 4.13                     | 1.74                                  | 1.31                               | 4.13                     | 1.74                                  | 1.31                               |
| Amoxicillin susp     | 25mg/mL    | 15 mL/day, 7 days   | 100                           | 1.10                     | 1.10                                  | 0.83                               | 0.83                     | 0.83                                  | 0.62                               | 0.96                     | 0.96                                  | 0.73                               |
| Benzylpenicillin inj | 5MU/vial   | 4 vials/day, 3 days | 12                            | 86.12                    | 10.33                                 | 7.80                               | 74.06                    | 8.89                                  | 6.70                               | 112.30                   | 13.48                                 | 10.17                              |
| Bisoprolol           | 5mg        | 2 tab/day, 30 days  | 60                            | 13.53                    | 8.12                                  | 6.13                               |                          |                                       |                                    | 10.28                    | 6.17                                  | 4.66                               |
| Captopril            | 25mg       | 3 tab/day, 30 days  | 90                            | 4.13                     | 3.72                                  | 2.81                               | 2.41                     | 2.17                                  | 1.64                               | 7.87                     | 7.09                                  | 5.35                               |
| Carbamazepin         | 200mg      | 4 tab/day, 30 days  | 120                           | 5.10                     | 6.12                                  | 4.62                               | 4.13                     | 4.96                                  | 3.74                               | 5.81                     | 6.97                                  | 5.26                               |
| Ceftriaxone inj      | 1 g/vial   | 4 vials/day, 3 days | 12                            | 122.63                   | 14.72                                 | 11.10                              | 117.12                   | 14.05                                 | 10.60                              | 114.02                   | 13.68                                 | 10.32                              |
| Ciprofloxacin        | 500mg      | 2 tab/day, 7 days   | 14                            | 10.33                    | 1.45                                  | 1.09                               | 6.89                     | 0.96                                  | 0.73                               | 8.27                     | 1.16                                  | 0.87                               |
| Cotrimoxazole        | 480mg      | 4 tab/day, 7 days   | 28                            | 2.48                     | 0.69                                  | 0.52                               | 2.76                     | 0.77                                  | 0.58                               | 3.10                     | 0.87                                  | 0.65                               |
| Cotrimoxazole susp   | 8+40 mg/mL | 10 mL/day, 7 days   | 100                           | 1.10                     | 1.10                                  | 0.83                               | 0.86                     | 0.86                                  | 0.65                               | 0.82                     | 0.82                                  | 0.62                               |
| Diazepam             | 5mg        | 6 tab/day, 7 days   | 42                            | 1.23                     | 0.52                                  | 0.39                               | 1.72                     | 0.72                                  | 0.55                               | 2.76                     | 1.16                                  | 0.87                               |
| Diazepam inj         | 5mg/mL     | 6 amp/day, 2 days   | 12                            |                          |                                       | -                                  | 35.82                    | 4.30                                  | 3.24                               | 69.79                    | 8.37                                  | 6.32                               |
| Erythromycin         | 250mg      | 8 tab/day, 7 days   | 56                            | 6.89                     | 3.86                                  | 2.91                               | 6.20                     | 3.47                                  | 2.62                               | 7.58                     | 4.24                                  | 3.20                               |
| Fluconazole          | 200mg      | 1 tab/day, 30 days  | 30                            | 21.36                    | 6.41                                  | 4.83                               | 27.56                    | 8.27                                  | 6.24                               | 33.99                    | 10.20                                 | 7.69                               |

| Medicine name               | Strength       | Course of treatment         | Number of units per treatment | Retail pharmacies        |                                       |                                    | CHAM facilities          |                                       |                                    | Private clinics          |                                       |                                    |
|-----------------------------|----------------|-----------------------------|-------------------------------|--------------------------|---------------------------------------|------------------------------------|--------------------------|---------------------------------------|------------------------------------|--------------------------|---------------------------------------|------------------------------------|
|                             |                |                             |                               | Median price in US Cents | Price per course of treatment in US\$ | Number of days to afford treatment | Median price in US cents | Price per course of treatment in US\$ | Number of days to afford treatment | Median price in US cents | Price per course of treatment in US\$ | Number of days to afford treatment |
| Gentamicin                  | 40mg/mL        | 6 mL at once                | 6                             | 13.78                    | 0.83                                  | 0.62                               | 20.67                    | 1.24                                  | 0.94                               | 37.32                    | 2.24                                  | 1.69                               |
| Hydrochlorothiazide         | 25mg           | 1 tab/day, 30 days          | 30                            | 0.92                     | 0.28                                  | 0.21                               | 1.38                     | 0.41                                  | 0.31                               | 3.10                     | 0.93                                  | 0.70                               |
| Insulin soluble inj         | 100IU/mL, 10mL | 30 IU/day, 30 days          | 10                            | 206.68                   | 20.67                                 | 15.59                              | 107.47                   | 10.75                                 | 8.11                               | 130.90                   | 13.09                                 | 9.88                               |
| Insulin zinc susp inj       | 100IU/mL, 10mL | 30 IU/day, 30 days          | 10                            |                          |                                       | -                                  | 168.79                   | 16.88                                 | 12.73                              | 130.90                   | 13.09                                 | 9.88                               |
| Magnesium sulphate 50 % inj | 50%, 2mL       | 10 amp/ course              | 10                            |                          |                                       | -                                  | 37.20                    | 3.72                                  | 2.81                               | 94.38                    | 9.44                                  | 7.12                               |
| Metformin                   | 500mg          | 4 tab/day, 30 days          | 120                           | 3.44                     | 4.13                                  | 3.12                               | 2.76                     | 3.31                                  | 2.49                               | 5.51                     | 6.61                                  | 4.99                               |
| Methyldopa                  | 250mg          | 6 tab/day, 30 days          | 180                           | 7.23                     | 13.02                                 | 9.82                               | 5.51                     | 9.92                                  | 7.48                               | 5.74                     | 10.33                                 | 7.80                               |
| Metronidazol                | 200/250mg      | 6 tab/day, 7 days           | 42                            | 1.84                     | 0.77                                  | 0.58                               | 2.76                     | 1.16                                  | 0.87                               | 2.66                     | 1.12                                  | 0.84                               |
| Misoprostol                 | 200mcg         | 4 tab at once               | 4                             | 41.34                    | 1.65                                  | 1.25                               | 22.39                    | 0.90                                  | 0.68                               | 89.56                    | 3.58                                  | 2.70                               |
| Oxytocin                    | 10IU/mL, 1mL   | 2 amp at once               | 2                             |                          |                                       | -                                  | 55.11                    | 1.10                                  | 0.83                               | 12.50                    | 2.50                                  | 0.62                               |
| Phenobarbital sodium inj    | 200mg/mL, 1mL  | 3 amp/day, 3 days           | 9                             |                          |                                       | -                                  | 71.65                    | 6.45                                  | 4.86                               | 0.96                     | 0.96                                  | 9.06                               |
| Phenobarbital sodium        | 30mg           | 3 tab/day, 30 days          | 90                            | 1.38                     | 1.24                                  | 0.94                               | 1.38                     | 1.24                                  | 0.94                               | 112.30                   | 13.48                                 | 1.54                               |
| Phenytoin sodium            | 100mg          | 3 tab/day, 30 days          | 90                            | 8.61                     | 7.75                                  | 5.85                               | 0.69                     | 0.62                                  | 0.47                               | 7.87                     | 7.09                                  | -                                  |
| Salbutamol inhaler          | 100 mcg/dose   | 1 tube of 200 doses/30 days | 200                           | 2.07                     | 4.13                                  | 3.12                               | 1.38                     | 2.76                                  | 2.08                               | 114.02                   | 13.68                                 | 3.12                               |
| Simvastatin                 | 20mg           | 1 tab/day, 30 days          | 30                            | 13.53                    | 4.06                                  | 3.06                               |                          |                                       | -                                  | 3.54                     | 0.99                                  | -                                  |
| Sodium chloride inj         | 0.9%, 1Litre   | 2L/day, 3 days              | 6000                          |                          |                                       | -                                  | 0.24                     | 14.47                                 | 10.91                              | 8.27                     | 1.16                                  | 15.61                              |

| Medicine name    | Strength | Course of treatment | Number of units per treatment | Retail pharmacies        |                                       |                                    | CHAM facilities          |                                       |                                    | Private clinics          |                                       |                                    |
|------------------|----------|---------------------|-------------------------------|--------------------------|---------------------------------------|------------------------------------|--------------------------|---------------------------------------|------------------------------------|--------------------------|---------------------------------------|------------------------------------|
|                  |          |                     |                               | Median price in US Cents | Price per course of treatment in US\$ | Number of days to afford treatment | Median price in US cents | Price per course of treatment in US\$ | Number of days to afford treatment | Median price in US cents | Price per course of treatment in US\$ | Number of days to afford treatment |
| Sodium valproate | 200mg    | 4 tab/day, 30 days  | 120                           | 13.09                    | 15.71                                 | 11.85                              | 6.89                     | 8.27                                  | 6.24                               | 3.10                     | 0.87                                  | 47.23                              |
